# Supplementary material for: Comparison of two human organoid models of lung and intestinal inflammation reveals Toll‐like receptor signalling activation and monocyte recruitment
Source: PubMed Central journal article supplement (PMC7200218; doi:10.1002/cti2.1131), 2020-05-05
Supplement: CTI2-9-e1131-s001.pdf [file CTI2-9-e1131-s001.pdf]

# **Comparison of two human organoid models of lung and intestinal inflammation reveals Toll-like receptor signalling activation and monocyte recruitment.**

## **Supplementary material**

**Authors and affiliations:** Shyam Sushama Jose<sup>1#</sup>, Marco De Zuani<sup>1#</sup>, Federico Tidu<sup>1,2</sup>, Marcela Hortová Kohoutková<sup>1</sup>, Lucia Pazzagli<sup>3</sup>, Giancarlo Forte<sup>1</sup>, Roberta Spaccapelo<sup>3</sup>, Teresa Zelante<sup>3</sup>, Jan Frič<sup>1,4\*</sup>

<sup>1</sup> International Clinical Research Center, St. Anne's University Hospital Brno, Brno, Czech Republic

<sup>2</sup> Department of Biology, Faculty of Medicine, Masaryk University, Czech Republic

<sup>3</sup> Department of Experimental Medicine and University Research Center for Functional Genomic (C.U.R.Ge.F), University of Perugia, Perugia, Italy.

<sup>4</sup> Institute of Hematology and Blood Transfusion, Prague, Czech Republic

# The authors contributed equally

\*Corresponding author

**Corresponding address:** Jan Frič, FNUSA-ICRC, Pekařská 53, Brno 656 91,

jan.fric@fnusa.cz / Tel: +420 511 158 279

## Supplementary figure 1

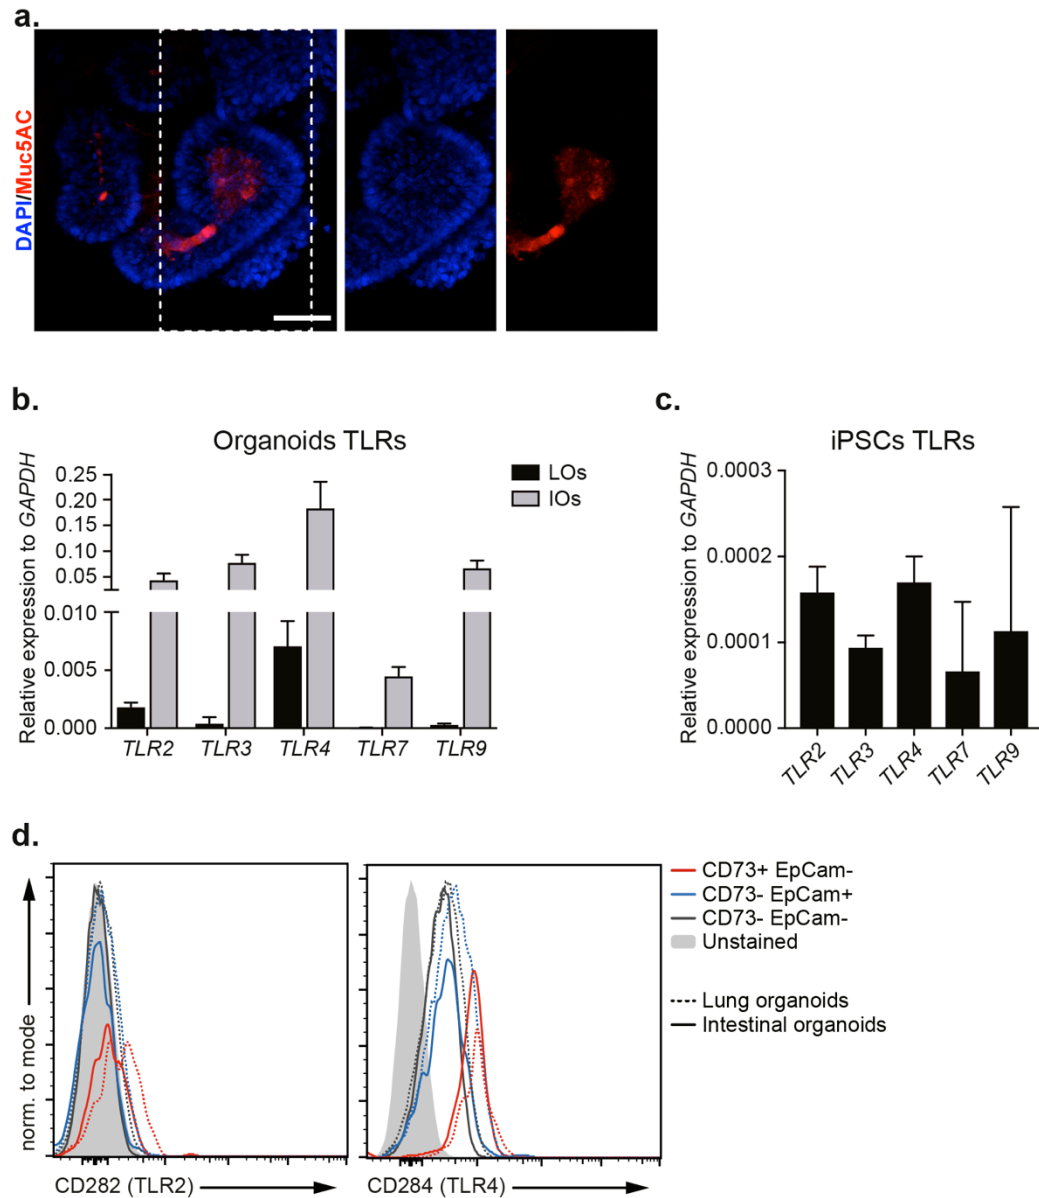

**Supplementary figure 1: Organoid characterization.** (a) Immunofluorescent labelling of Muc5AC shows the presence of mucins in the lumen of lung organoids. Maximum intensity projection of z-stack. Scale bar = 50 $\mu$ m. (b) qPCR analyses on iPSC show that these cells express very low levels of TLRs transcript before differentiation into organoids. (c) Flow cytometric analyses shows that both organoids express TLR2 and TLR4, and that LOs express higher levels of both TLRs. Dashed lines= lung organoids, filled lines= Intestinal organoids. Representative experiment of three replicates.

## Supplementary figure 2

a.

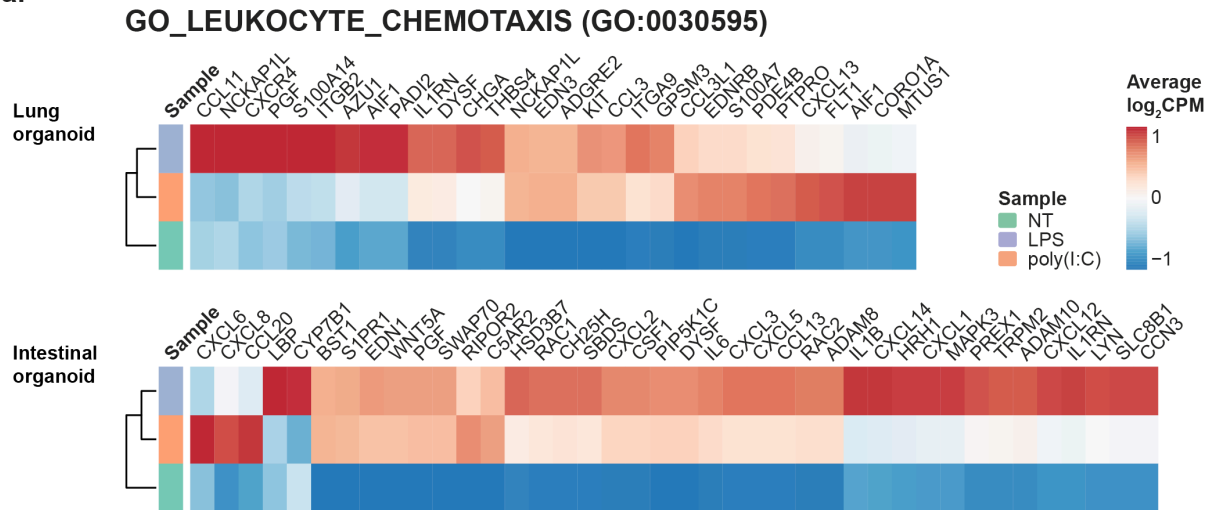

b.

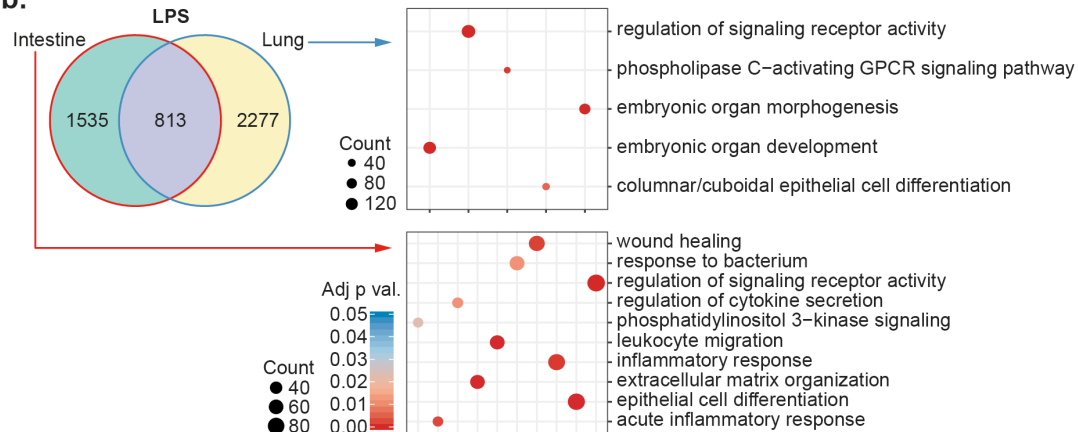

c.

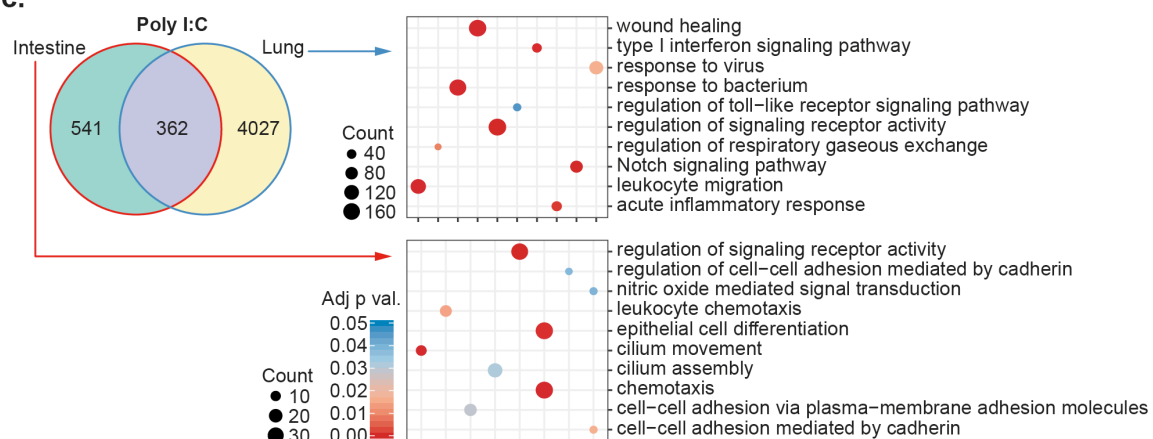

**Supplementary figure 2: Lung and intestinal organoids shows differential response to LPS and poly(I:C).** Dissection of the significantly up-regulated genes in response to LPS and poly(I:C) shows that these treatments differentially regulate genes involved in leukocyte

chemotaxis **(a)**. Venn plots built with the differentially expressed genes of stimulated lung and intestinal organoids shows that the two organoid models regulate different pathways against the same agonist. Intestinal organoids respond better to LPS stimulation, regulating pathways involved in acute inflammatory response, response to bacterium and wound healing **(b)**. On the contrary, poly(I:C) stimulation induces a more profound response in lung organoids, which regulate IFN signalling pathways and acute inflammatory responses **(c)**.

### Supplementary figure 3

a.

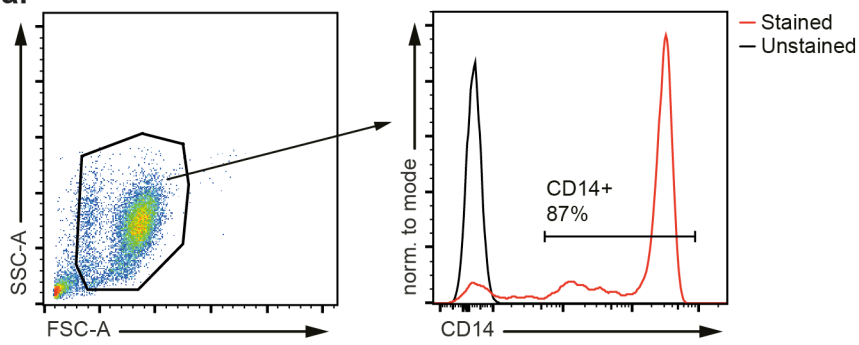

**Supplementary figure 3: Monocyte purity.** (a) Human monocytes were negatively isolated from fresh buffy coat. Purity was assessed by flow cytometry after staining for CD14. Representative results of 3 independent experiments are shown.

**Supplementary video: Monocytes and lung organoids tightly interact at the basal layer.** 3D- and volume representation of confocal Z-stack demonstrate that monocytes tightly associate with the organoid basal cell layer during the coculture, showing the presence of protrusions between the E-cadherin<sup>+</sup> cells. Blue=DAPI, green=CD45, magenta=E-cadherin.

**Supplementary table 1.** List and details of antibodies used for immunofluorescent staining.

| <b>Antibody</b>            | <b>Conjugation</b> | <b>Vendor</b>                | <b>Clone</b> | <b>Catalogue #</b> | <b>Dilution</b> |
|----------------------------|--------------------|------------------------------|--------------|--------------------|-----------------|
| CD45                       | Unconjugated       | Invitrogen                   | YAML501.4    | MA517687           | 1:100           |
| FoxJ1                      | Unconjugated       | eBioscience                  | 2A5          | 14-9965-82         | 1:100           |
| E-cadherin                 | Unconjugated       | Cell Signaling<br>Technology | 24E10        | 3195S              | 1:200           |
| CDX2                       | Unconjugated       | Invitrogen                   | ZC007        | 397800             | 1:100           |
| Beta-2<br>defensin         | Unconjugated       | Invitrogen                   | -            | PA5-47388          | 1:100           |
| ASCL2                      | Unconjugated       | Invitrogen                   | -            | PA5-47852          | 1:50            |
| Phalloidin                 | AlexaFluor<br>647  | Invitrogen                   | -            | A22287             | 1:200           |
| Donkey anti-<br>rat IgG    | AlexaFluor<br>488  | Invitrogen                   | -            | A21208             | 1:500           |
| Donkey anti-<br>mouse IgG  | AlexaFluor<br>555  | Invitrogen                   | -            | A31570             | 1:500           |
| Donkey anti-<br>rabbit IgG | AlexaFluor<br>647  | Invitrogen                   | -            | A31573             | 1:500           |
| Donkey anti-<br>mouse IgG  | AlexaFluor<br>488  | Invitrogen                   | -            | A21202             | 1:500           |
| Donkey anti-               | AlexaFluor         | Invitrogen                   | -            | A31572             | 1:500           |

|                       |                |            |   |        |       |
|-----------------------|----------------|------------|---|--------|-------|
| rabbit IgG            | 555            |            |   |        |       |
| Donkey anti-goat IgG  | AlexaFluor 546 | Invitrogen | - | A11056 | 1:500 |
| Donkey anti-sheep IgG | AlexaFluor 555 | Invitrogen | - | A21436 | 1:500 |



**Supplementary table 2:** List and details of antibodies used for flow cytometry experiments.

| <b>Antibody</b>  | <b>Conjugation</b> | <b>Vendor</b> | <b>Clone</b> | <b>Catalogue #</b> | <b>Dilution</b> |
|------------------|--------------------|---------------|--------------|--------------------|-----------------|
| CD14             | PE                 | BioLegend     | 63D3         | 367104             | 1:100           |
| CD16             | PE/Cy5             | BioLegend     | 3G8          | 302010             | 1:100           |
| HLA-DR           | PE/dazzle 594      | BioLegend     | L243         | 307653             | 1:100           |
| CD45             | PacificBlue        | BioLegend     | 2D1          | 368540             | 1:100           |
| CD86             | BV421              | BioLegend     | IT2.2        | 305426             | 1:100           |
| CD68             | FITC               | BioLegend     | Y1/82A       | 333806             | 1:100           |
| CD184            | PE/Cy7             | eBioscience   | 12G5         | 25-9999-42         | 1:100           |
| CD73             | eFluor 450         | eBioscience   | AD2          | 48-0739-42         | 1:100           |
| CD326<br>(EpCam) | Biotin             | eBioscience   | 1B7          | 13-9326-82         | 1:100           |
| Streptavidin     | BV650              | BioLegend     | -            | 405231             | 1:200           |
| CD282<br>(TLR2)  | AlexaFluor<br>488  | BioLegend     | TL2.1        | 309712             | 1:100           |
| CD284<br>(TLR4)  | PE                 | eBioscience   | HTA125       | 12-9917-42         | 1:100           |

**Supplementary Table 3:** List of TaqMan® Gene Expression Assay probes used for qPCR experiments.

| <b>Gene ID</b>  | <b>TaqMan Probe Id</b><br><b>(Cat: 4331182)</b> |
|-----------------|-------------------------------------------------|
| <i>ASCL2</i>    | Hs00270888_s1                                   |
| <i>CDX2</i>     | Hs01078080_m1                                   |
| <i>LGR5</i>     | Hs00969422_m1                                   |
| <i>MCP-1</i>    | Hs00234140_m1                                   |
| <i>IL-8</i>     | Hs00174103_m1                                   |
| <i>IL-1b</i>    | Hs01555410_m1                                   |
| <i>IL-6</i>     | Hs00174131_m1                                   |
| <i>IL-12p40</i> | Hs01011518_m1                                   |
| <i>TNFa</i>     | Hs00174128_m1                                   |
| <i>TLR2</i>     | Hs00610101_m1                                   |
| <i>TLR3</i>     | Hs01551078_m1                                   |
| <i>TLR4</i>     | Hs00152939_m1                                   |
| <i>TLR7</i>     | Hs00152971_m1                                   |
| <i>TLR9</i>     | Hs00152973_m1                                   |
| <i>MMP9</i>     | Hs00957562_m1                                   |
| <i>COX-2</i>    | Hs00153133_m1                                   |

|               |               |
|---------------|---------------|
| <i>S100A8</i> | Hs00374263_m1 |
| <i>CRP</i>    | Hs00265044_m1 |
| <i>FOXJ1</i>  | Hs00230964_m1 |
| <i>NKX2.1</i> | Hs00968940_m1 |
| <i>DEFB4</i>  | Hs00823638_m1 |
| <i>DEFB5</i>  | Hs00845803_g1 |
